# Supplementary material
Source: Springer Nature journal article supplement (https://www.springermedizin.de/resource/supplementary/13256_2007_348_MOESM3_ESM.pdf/9645784)
Supplement: MOESM3 [file 9645784]

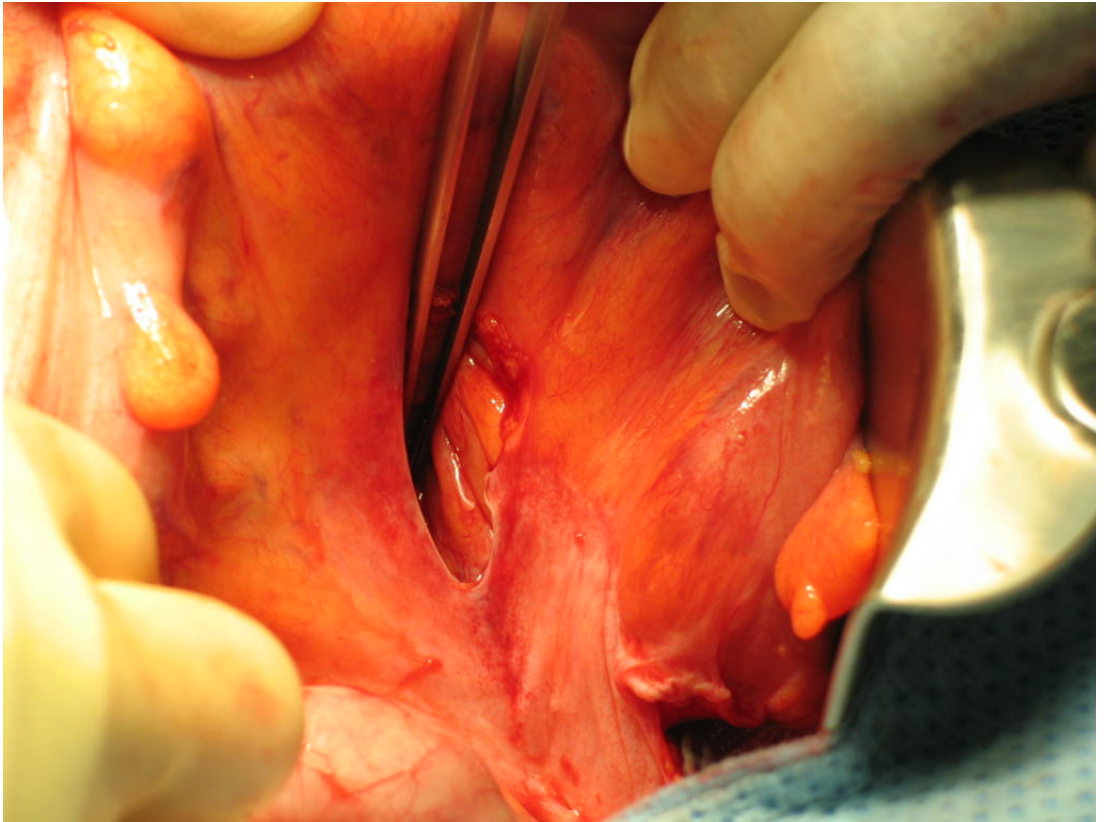

Figure 3: The hernial defect in the sigmoid mesentery measured approximately 4cm and consisted of two leaves of the mesentery.
